# Supplementary material for: Middle Eocene greenhouse warming facilitated by diminished weathering feedback
Source: PubMed Central journal article supplement (PMC6056486; doi:10.1038/s41467-018-05104-9), 2018-07-23
Supplement: 41467_2018_5104_MOESM1_ESM.pdf [file 41467_2018_5104_MOESM1_ESM.pdf]

**Middle Eocene greenhouse warming facilitated by diminished weathering feedback**  
**Van der Ploeg et al.**

**Supplementary Information**

This PDF file includes:

- Supplementary Figures 1 – 11
- Supplementary Tables 1 – 5
- Supplementary References 1 – 18

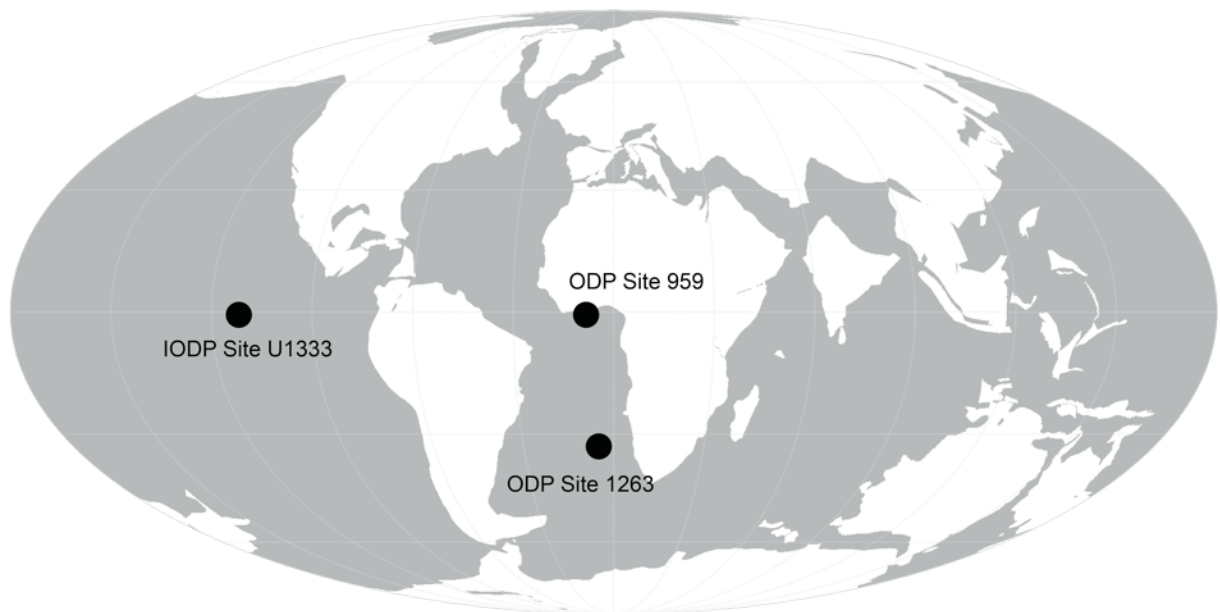

**Supplementary Figure 1: Paleogeographic reconstruction of 40 Ma showing the estimated locations of the study sites.** Shown are ODP Site 959 in the equatorial Atlantic along the African continent, ODP Site 1263 on the Walvis Ridge in the south Atlantic and IODP Site U1333 in the equatorial Pacific. The map was made with GPlates, based on the tectonic reconstructions of Seton et al. (2012)<sup>1</sup> and the paleomagnetic reference frame of Torsvik et al. (2012)<sup>2</sup>.

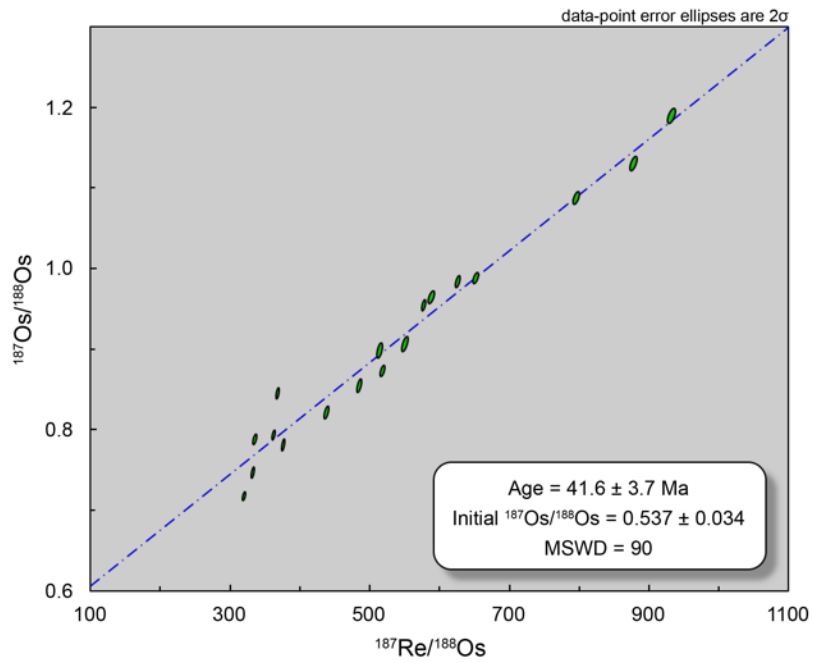

**Supplementary Figure 2: Re-Os isochron plot of all Site 959 samples.** The significant scatter (MSWD = 90) is best explained by the sample set possessing slightly variable initial  $^{187}\text{Os}/^{188}\text{Os}$  compositions and being deposited over a prolonged interval of time (i.e., several Myr).

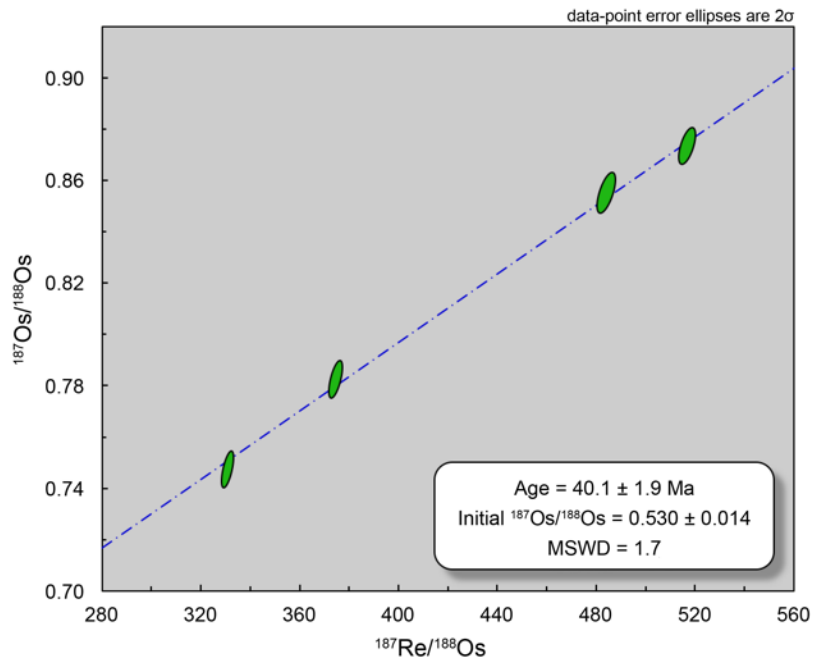

**Supplementary Figure 3: Re-Os isochron plot of Site 959 samples in the MECO interval between 600.35 and 581.51 mbsf.** These samples were selected because they were deposited in a short time interval (i.e., ~500 kyr), and yield virtually identical initial  $^{187}\text{Os}/^{188}\text{Os}$  compositions. The obtained isochron age of 40.1 Ma is in excellent agreement with the estimated ages of these samples – between 40.4 and 40.1 Ma – based on our age model for Site 959.

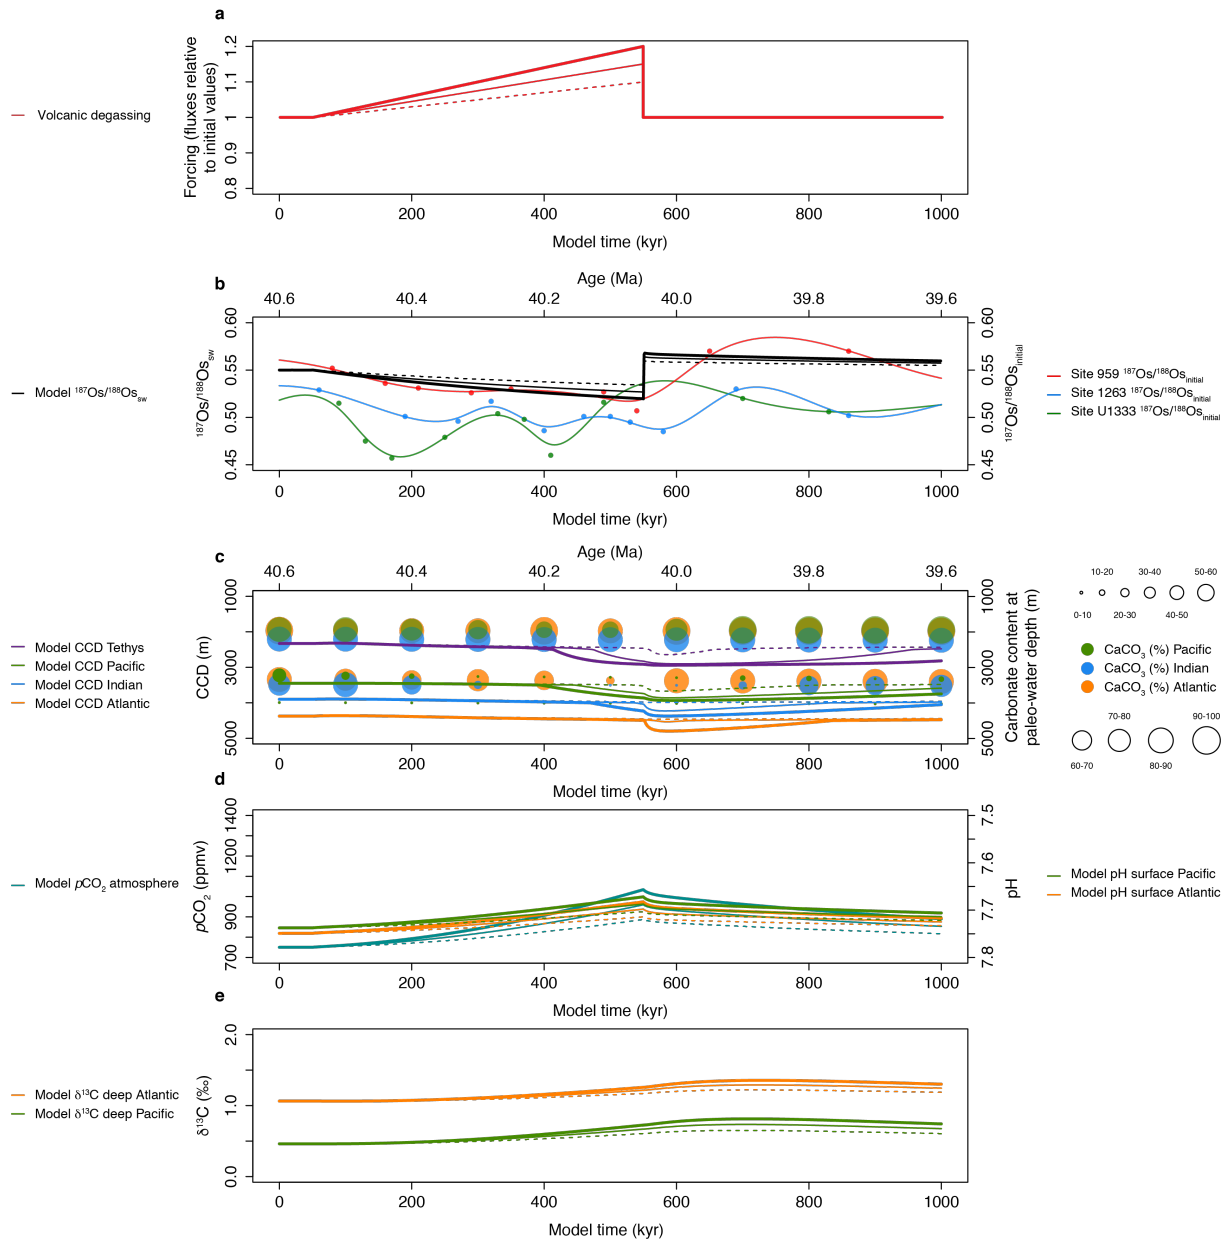

**Supplementary Figure 4: LOSCAR and Os cycle model simulations of the MECO. a,** Forcing for three scenarios involving a transient increase in the volcanic  $\text{CO}_2$  flux of 10% (dashed lines), 15% (thin solid lines) and 20% (thick solid lines) over ~500 kyr, while allowing the silicate and carbonate weathering fluxes to vary as a feedback response. **b,** Model response in the  $^{187}\text{Os}/^{188}\text{Os}$  composition of the global ocean, shown against smoothed fits to the MECO  $\text{Os}_i$  records from the study sites. **c,** Model CCD response of different ocean basins, shown against carbonate content (wt %) records for different depths in the Atlantic, Indian and Pacific oceans as compiled by Sluijs et al. (2013)<sup>3</sup>. **d,** Model atmospheric  $p\text{CO}_2$  response and pH response for the surface Atlantic and Pacific oceans. **e,** Model  $\delta^{13}\text{C}$  response for the DIC of the deep Atlantic and Pacific oceans.

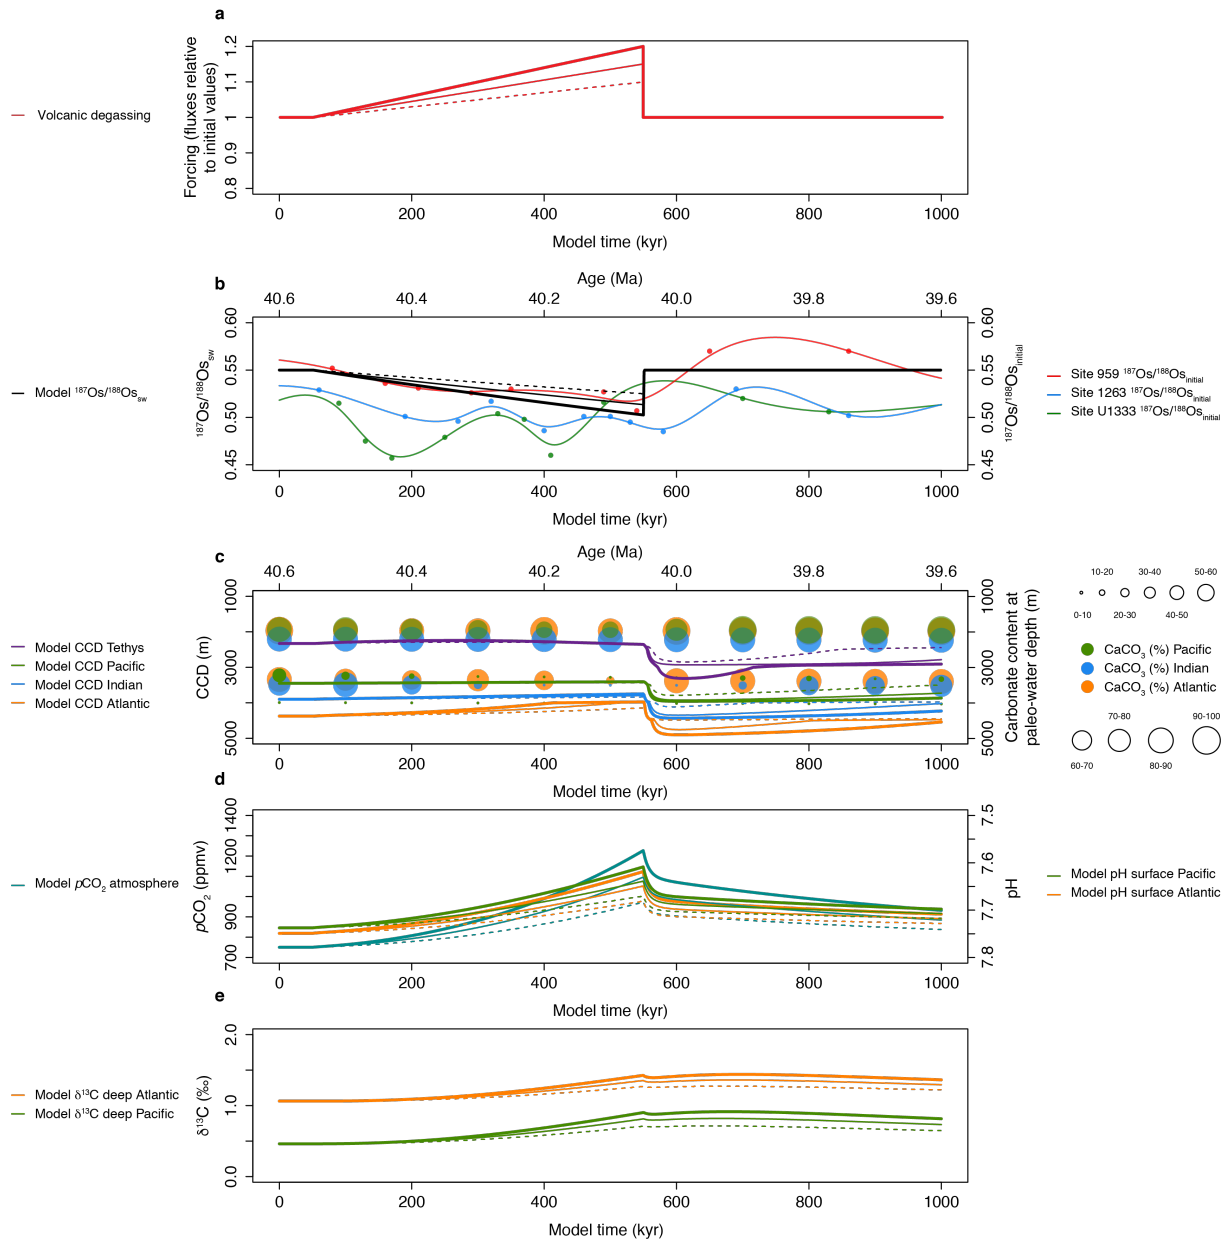

**Supplementary Figure 5: LOSCAR and Os cycle model simulations of the MECO. a,** Forcing for three scenarios involving a transient increase in the volcanic  $\text{CO}_2$  flux of 10% (dashed lines), 15% (thin solid lines) and 20% (thick solid lines) over  $\sim 500$  kyr, while maintaining the silicate and carbonate weathering fluxes at constant value. **b,** Model response in the  $^{187}\text{Os}/^{188}\text{Os}$  composition of the global ocean, shown against smoothed fits to the MECO  $\text{Os}_i$  records from the study sites. **c,** Model CCD response of different ocean basins, shown against carbonate content (wt %) records for different depths in the Atlantic, Indian and Pacific oceans as compiled by Sluijs et al. (2013)<sup>3</sup>. **d,** Model atmospheric  $p\text{CO}_2$  response and pH response for the surface Atlantic and Pacific oceans. **e,** Model  $\delta^{13}\text{C}$  response for the DIC of the deep Atlantic and Pacific oceans.

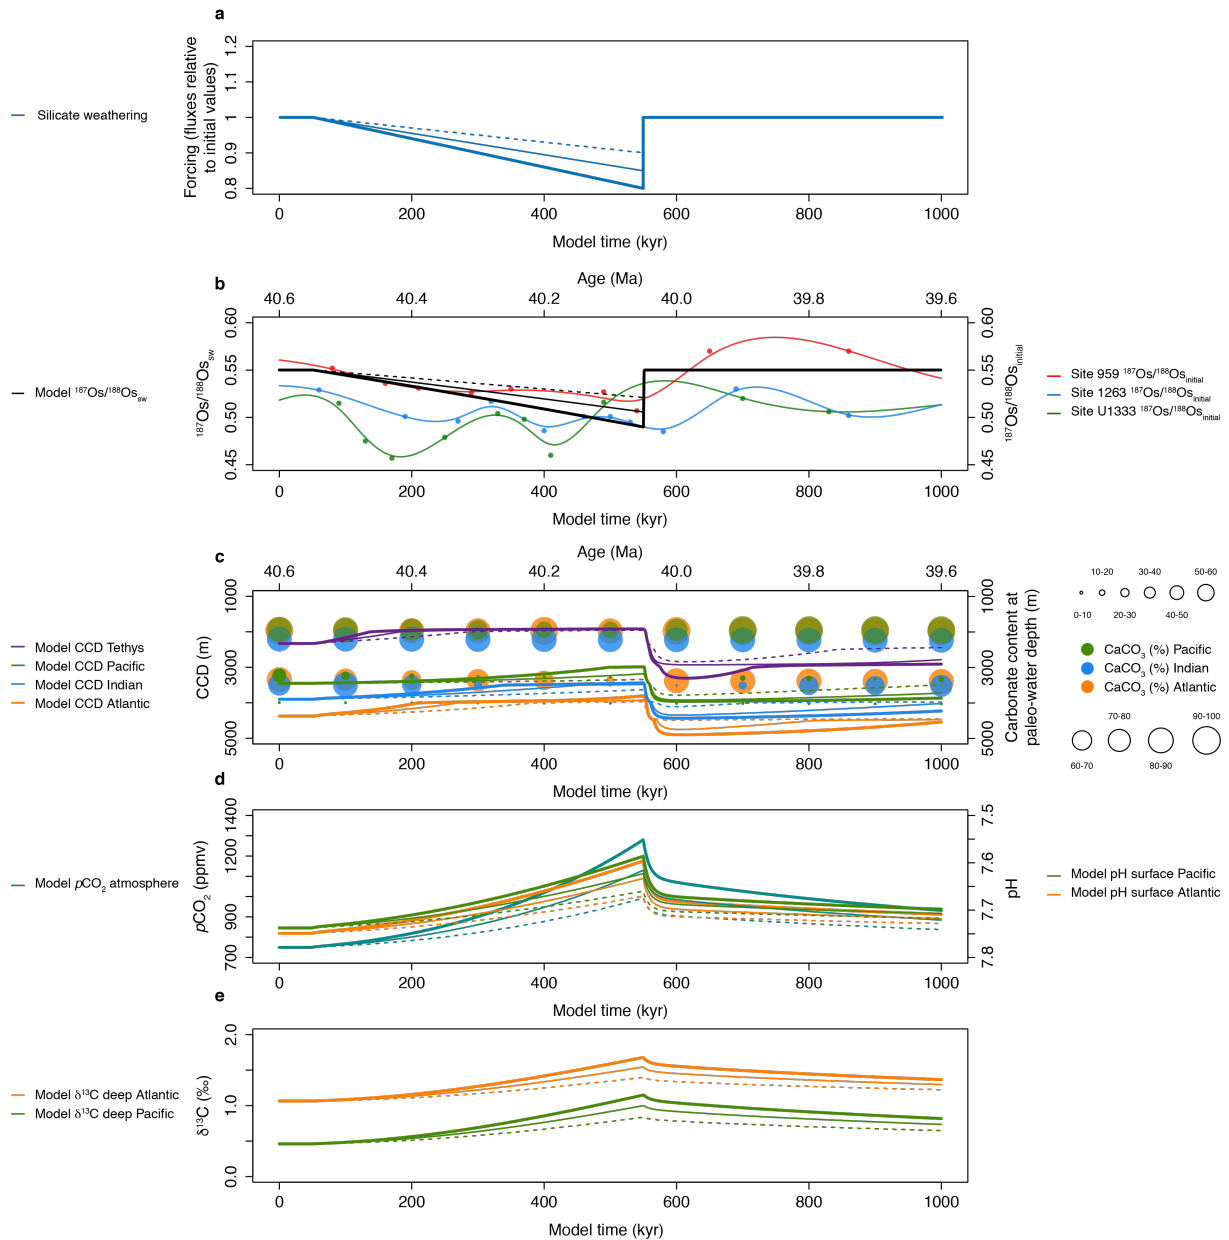

**Supplementary Figure 6: LOSCAR and Os cycle model simulations of the MECO. a,** Forcing for three scenarios involving a transient decrease in the silicate weathering flux of 10% (dashed lines), 15% (thin solid lines) and 20% (thick solid lines) over ~500 kyr, while keeping the volcanic CO<sub>2</sub> flux and the carbonate weathering flux at constant value. **b,** Model response in the  $^{187}\text{Os}/^{188}\text{Os}$  composition of the global ocean, shown against smoothed fits to the MECO Os<sub>i</sub> records from the study sites. **c,** Model CCD response of different ocean basins, shown against carbonate content (wt %) records for different depths in the Atlantic, Indian and Pacific oceans as compiled by Sluijs et al. (2013)<sup>3</sup>. **d,** Model atmospheric  $p\text{CO}_2$  response and pH response for the surface Atlantic and Pacific oceans. **e,** Model  $\delta^{13}\text{C}$  response for the DIC of the deep Atlantic and Pacific oceans.

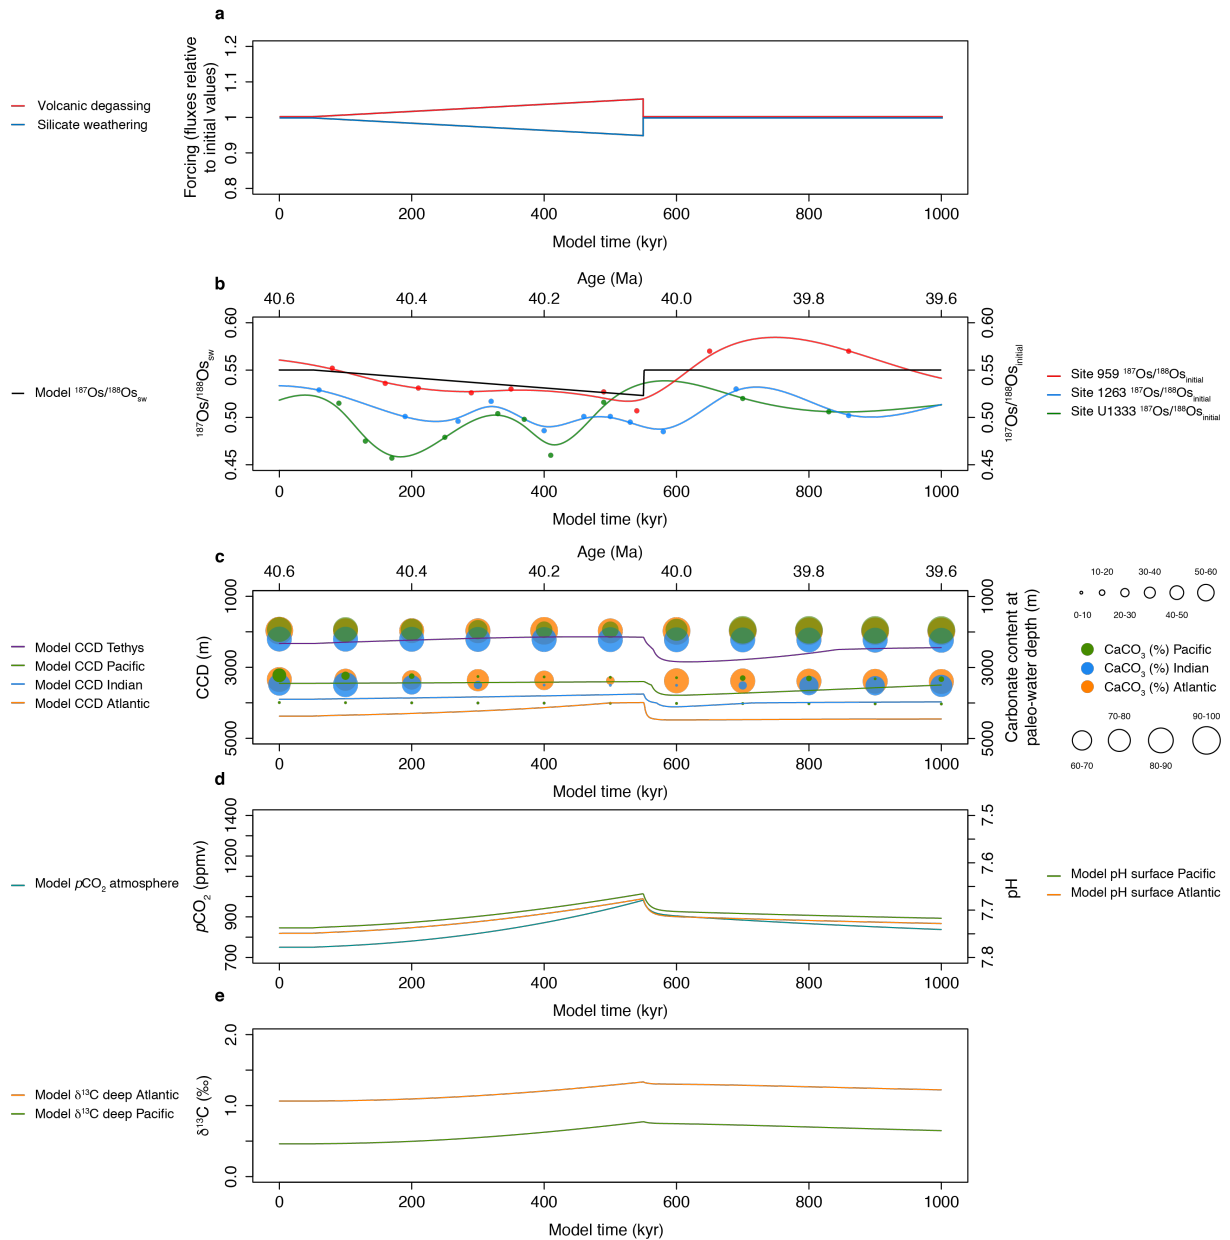

**Supplementary Figure 7: LOSCAR and Os cycle model simulations of the MECO. a,** Forcing for a scenario involving a transient 5% increase in the volcanic CO<sub>2</sub> flux combined with a 5% decrease in the silicate weathering flux over ~500 kyr, while keeping the carbonate weathering flux at constant value. **b,** Model response in the  $^{187}\text{Os}/^{188}\text{Os}$  composition of the global ocean, shown against smoothed fits to the MECO Os<sub>i</sub> records from the study sites. **c,** Model CCD response of different ocean basins, shown against carbonate content (wt %) records for different depths in the Atlantic, Indian and Pacific oceans as compiled by Sluijs et al. (2013)<sup>3</sup>. **d,** Model atmospheric  $p\text{CO}_2$  response and pH response for the surface Atlantic and Pacific oceans. **e,** Model  $\delta^{13}\text{C}$  response for the DIC of the deep Atlantic and Pacific oceans.



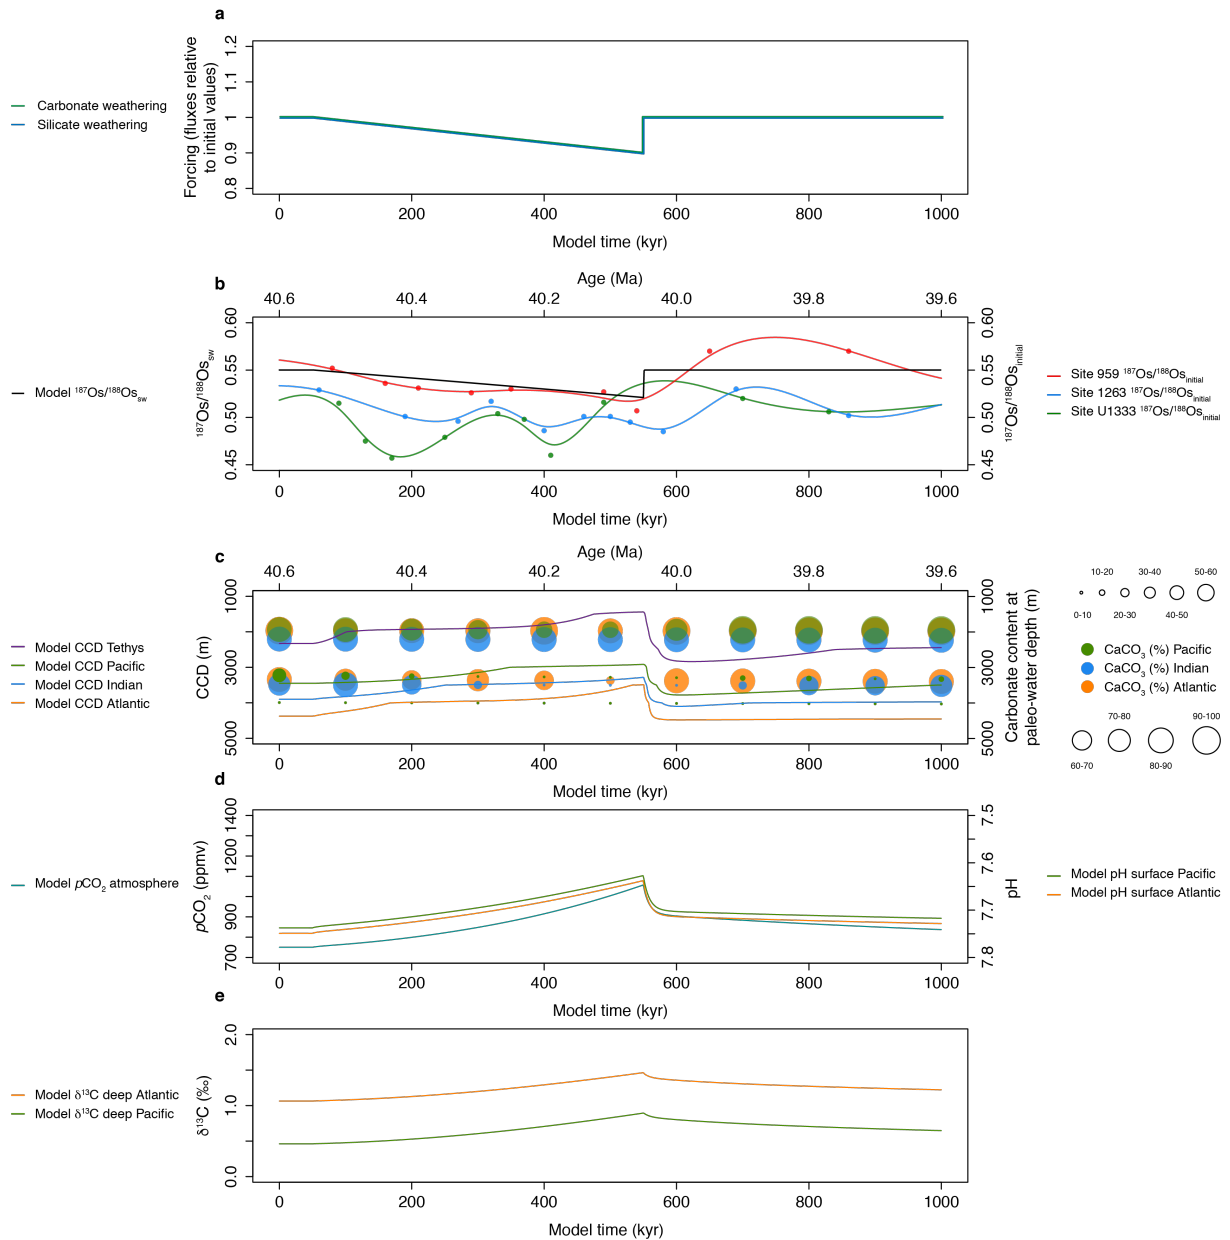

**Supplementary Figure 8: LOSCAR and Os cycle model simulations of the MECO. a,** Forcing for a scenario involving a transient, combined 10% decrease in the silicate and carbonate weathering fluxes over ~500 kyr, while keeping the volcanic CO<sub>2</sub> flux at constant value. **b,** Model response in the  $^{187}\text{Os}/^{188}\text{Os}$  composition of the global ocean, shown against smoothed fits to the MECO Os<sub>i</sub> records from the study sites. **c,** Model CCD response of different ocean basins, shown against carbonate content (wt %) records for different depths in the Atlantic, Indian and Pacific oceans as compiled by Sluijs et al. (2013)<sup>3</sup>. **d,** Model atmospheric  $p\text{CO}_2$  response and pH response for the surface Atlantic and Pacific oceans. **e,** Model  $\delta^{13}\text{C}$  response for the DIC of the deep Atlantic and Pacific oceans.

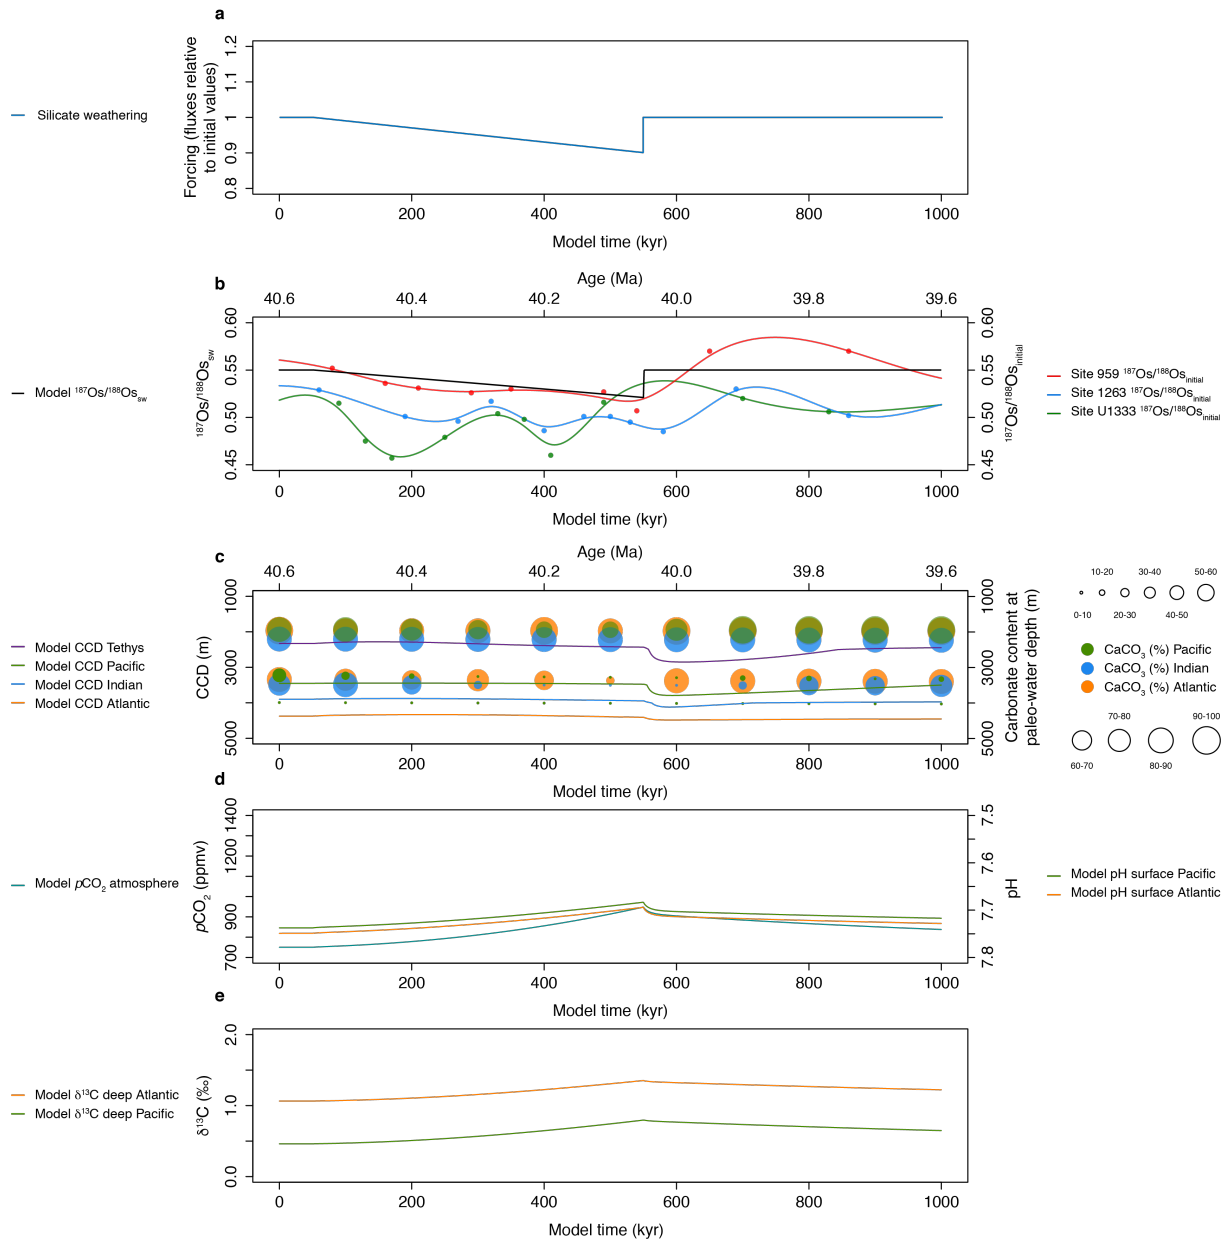

**Supplementary Figure 9: LOSCAR and Os cycle model simulations of the MECO. a,** Forcing for a scenario involving a transient 10% decrease in the silicate weathering flux over ~500 kyr, while keeping the volcanic CO<sub>2</sub> flux at constant value and allowing the carbonate weathering flux to vary as a feedback response. **b,** Model response in the  $^{187}\text{Os}/^{188}\text{Os}$  composition of the global ocean, shown against smoothed fits to the MECO Os<sub>i</sub> records from the study sites. **c,** Model CCD response of different ocean basins, shown against carbonate content (wt %) records for different depths in the Atlantic, Indian and Pacific oceans as compiled by Sluijs et al. (2013)<sup>3</sup>. **d,** Model atmospheric  $p\text{CO}_2$  response and pH response for the surface Atlantic and Pacific oceans. **e,** Model  $\delta^{13}\text{C}$  response for the DIC of the deep Atlantic and Pacific oceans.

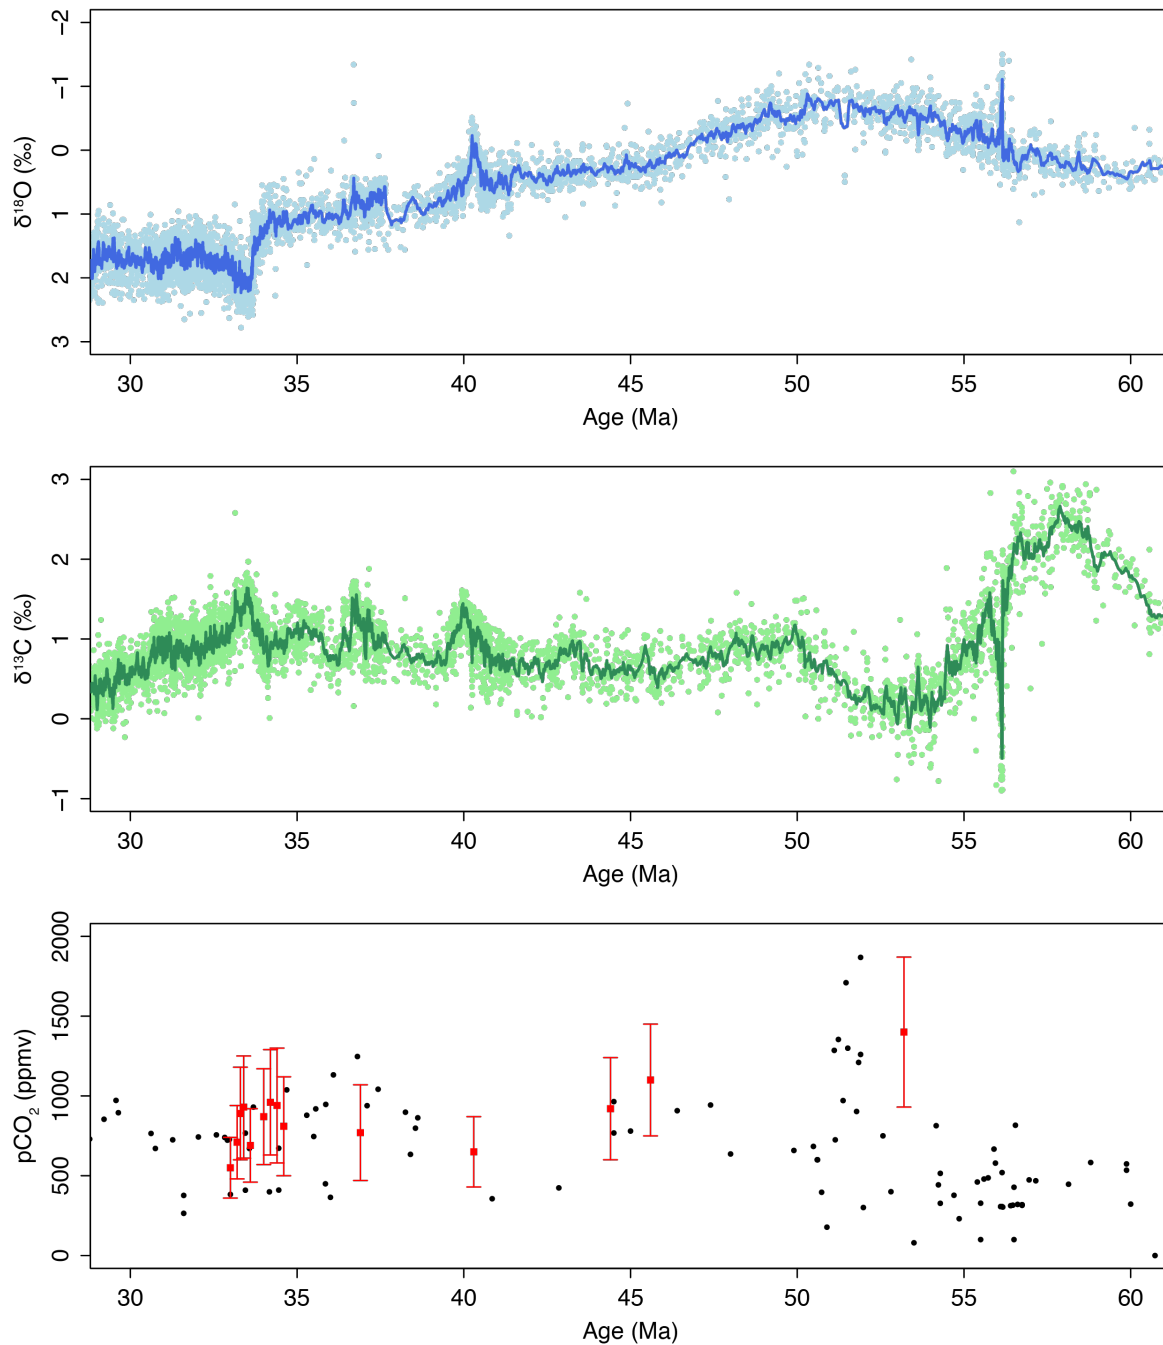

**Supplementary Figure 10: Eocene trends in benthic foraminiferal  $\delta^{18}\text{O}$  and  $\delta^{13}\text{C}$ , and atmospheric  $\text{pCO}_2$ .** **a**, Benthic  $\delta^{18}\text{O}$  compilation as published in Cramer et al. (2009)<sup>4</sup>, adjusted to the framework of the GTS2012<sup>5</sup> and plotted as individual data points and as a 10-point running average (solid line). **b**, Benthic  $\delta^{13}\text{C}$  compilation as published in Cramer et al. (2009)<sup>4</sup>, adjusted to the framework of the GTS2012<sup>5</sup> and plotted as individual data points and as a 10-point running average (solid line). **c**, Atmospheric  $\text{pCO}_2$  compilation as published in Foster et al. (2017)<sup>6</sup>, with the  $\delta^{11}\text{B}$ -based  $\text{pCO}_2$  estimates of Anagnostou et al. (2016)<sup>7</sup> highlighted in red.

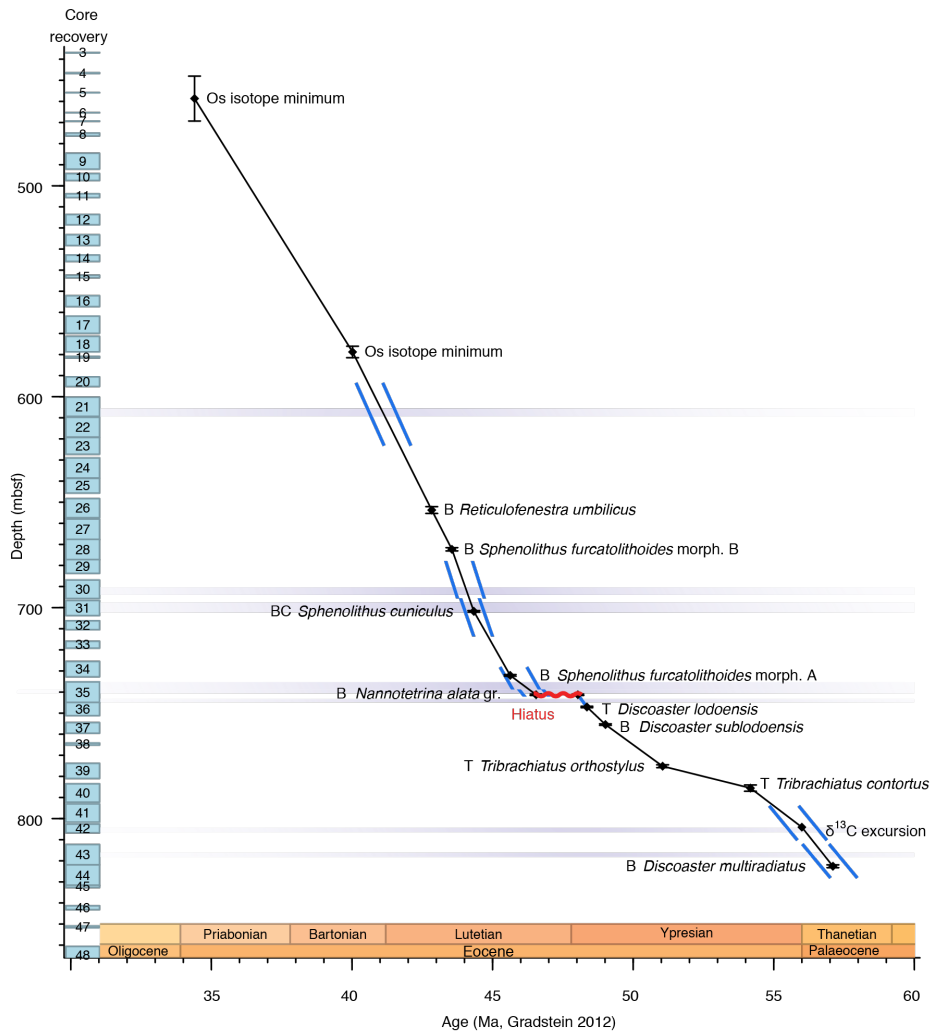

**Supplementary Figure 11: Age model for Site 959 Hole D as presented in Cramwinckel et al. (2018)<sup>8</sup>.** Diamonds with error bars show calcareous nannofossil and chemostratigraphic tie-points, adjusted to the framework of the GTS 2012<sup>5</sup>. The Os isotope minimum at ~40 Ma is derived from the MECO  $\text{Os}_i$  records presented in this study.

### Supplementary Table 1: Age model for Site 959.

| Stratigraphic datum                          | Depth (mbsf) | Age (Ma)<br>[GTS<br>2004] <sup>9</sup> | Age (Ma)<br>[GTS<br>2012] <sup>5</sup> | Source                                                                                           |
|----------------------------------------------|--------------|----------------------------------------|----------------------------------------|--------------------------------------------------------------------------------------------------|
| <sup>187</sup> Os/ <sup>188</sup> Os minimum | 466.6        | 34.5                                   | 34.65                                  | Ravizza & Paquay (2008) <sup>10</sup>                                                            |
| TEX <sub>86</sub> highest value at MECO peak | 578.25       | -                                      | 40.06                                  | This study, based on Cramwinckel et al. (2018) <sup>8</sup> , Bohaty et al. (2009) <sup>11</sup> |
| TEX <sub>86</sub> lowest value at MECO onset | 608.84       | -                                      | 40.52                                  | This study, based on Cramwinckel et al. (2018) <sup>8</sup> , Bohaty et al. (2009) <sup>11</sup> |
| FCO <i>Reticulofenestra umbilicus</i>        | 654.545      | -                                      | 42.84                                  | Shafik et al. (1998) <sup>12</sup> , Cramwinckel et al. (2018) <sup>8</sup>                      |

**Supplementary Table 2: Age model for Site 1263.**

| Stratigraphic datum                                     | Depth (mbsf) | Depth (adj rmcd)                        | Age (Ma)                            | Age (Ma)                | Source                             |
|---------------------------------------------------------|--------------|-----------------------------------------|-------------------------------------|-------------------------|------------------------------------|
|                                                         |              | [Westerhold et al., 2015] <sup>13</sup> | [Pälike et al., 2006] <sup>14</sup> | [GTS 2012] <sup>5</sup> |                                    |
| $\delta^{13}\text{C}$ highest value                     | 113.7        | 135.27                                  | 39.2                                | 39.3                    | Bohaty et al. (2009) <sup>11</sup> |
| $\delta^{18}\text{O}$ final lowest value at MECO peak   | 119.6        | 141.29                                  | 39.99                               | 40.06                   | Bohaty et al. (2009) <sup>11</sup> |
| $\delta^{18}\text{O}$ final highest value at MECO onset | 122.6        | 145.83                                  | 40.552                              | 40.52                   | Bohaty et al. (2009) <sup>11</sup> |
| $\delta^{13}\text{C}$ lowest value                      | 124.9        | 148.13                                  | 40.925                              | 40.81                   | Bohaty et al. (2009) <sup>11</sup> |
| C18r - C19n boundary                                    | 127.85       | 151.08                                  | 41.358                              | 41.154                  | Pälike et al. (2006) <sup>14</sup> |
| C19n - C19r boundary                                    | 129.25       | 152.48                                  | 41.51                               | 41.39                   | Pälike et al. (2006) <sup>14</sup> |
| $\delta^{13}\text{C}$ lowest value                      | 131.6        | 154.8                                   | 41.796                              | 41.64                   | Bohaty et al. (2009) <sup>11</sup> |

**Supplementary Table 3: Age model for Site U1333.**

| <b>Stratigraphic datum</b> | <b>Depth (adj rmcd)</b><br>[Westerhold et al., 2012] <sup>15</sup> | <b>Age (Ma)</b><br>[Pälike et al., 2006] <sup>14</sup> | <b>Age (Ma)</b><br>[GTS 2012] <sup>5</sup> | <b>Source</b>                        |
|----------------------------|--------------------------------------------------------------------|--------------------------------------------------------|--------------------------------------------|--------------------------------------|
| C17r - C18n.1n boundary    | 157.3                                                              | 38.449                                                 | 38.615                                     | Pälike et al. (2006) <sup>14</sup>   |
| T S. obtusus               | 158.15                                                             | 38.562                                                 | 38.71                                      | Toffanin et al. (2013) <sup>16</sup> |
| T C. grandis               | 158.55                                                             | 38.612                                                 | 38.76                                      | Toffanin et al. (2013) <sup>16</sup> |
| T C. solitus               | 159.95                                                             | 38.788                                                 | 38.92                                      | Toffanin et al. (2013) <sup>16</sup> |
| B S. obtusus               | 164.15                                                             | 39.314                                                 | 39.4                                       | Toffanin et al. (2013) <sup>16</sup> |
| C18n.1n - C18n.1r boundary | 166.075                                                            | 39.554                                                 | 39.627                                     | Pälike et al. (2006) <sup>14</sup>   |
| C18n.1r - C18n.2n boundary | 166.875                                                            | 39.602                                                 | 39.698                                     | Pälike et al. (2006) <sup>14</sup>   |
| C18n.2n - C18r boundary    | 169.57                                                             | 40.084                                                 | 40.145                                     | Pälike et al. (2006) <sup>14</sup>   |
| Bc D. hesslandii           | 172.69                                                             | 40.421                                                 | 40.41                                      | Toffanin et al. (2013) <sup>16</sup> |
| Bc D. bisectus             | 172.69                                                             | 40.421                                                 | 40.41                                      | Toffanin et al. (2013) <sup>16</sup> |
| T Furcatolithoides         | 174.5                                                              | 40.614                                                 | 40.56                                      | Toffanin et al. (2013) <sup>16</sup> |
| C18r - C19n boundary       | 181.5                                                              | 41.358                                                 | 41.154                                     | Pälike et al. (2006) <sup>14</sup>   |
| C19n - C19r boundary       | 183.225                                                            | 41.51                                                  | 41.39                                      | Pälike et al. (2006) <sup>14</sup>   |

**Supplementary Table 4: Overview of all LOSCAR model scenarios.** All forcings represent a gradual, linear increase/decrease to maximum values from  $t = 50$  kyr to  $t = 550$  kyr and are followed by a sudden drop to initial values. Initial  $p\text{CO}_2$  concentrations were set at 750 ppmv in all simulations.

| Scenario and Supplementary Figure | Silicate weathering flux | Volcanic CO <sub>2</sub> flux | Carbonate weathering flux |
|-----------------------------------|--------------------------|-------------------------------|---------------------------|
| 1 (5)                             | Feedback                 | +10%                          | Feedback                  |
| 2 (5)                             | Feedback                 | +15%                          | Feedback                  |
| 3 (5)                             | Feedback                 | +20%                          | Feedback                  |
| 4 (6)                             | Constant                 | +10%                          | Constant                  |
| 5 (6)                             | Constant                 | +15%                          | Constant                  |
| 6 (6)                             | Constant                 | +20%                          | Constant                  |
| 7 (7)                             | -10%                     | Constant                      | Constant                  |
| 8 (7)                             | -15%                     | Constant                      | Constant                  |
| 9 (7)                             | -20%                     | Constant                      | Constant                  |
| 10 (8)                            | -5%                      | +5%                           | Constant                  |
| 11 (9)                            | -10%                     | Constant                      | -10%                      |
| 12 (10)                           | -10%                     | Constant                      | Feedback                  |



**Supplementary Table 5: Overview of all default Os cycle parameters.** Present-day values are taken from the literature or fitted to match the present-day steady state observations. Pre-MECO values are either assumed to be similar to the present-day values or fitted to match the pre-MECO steady state observations.

| Parameter                 | Parameter description                                                     | Value                 | Reference and Comments                            |
|---------------------------|---------------------------------------------------------------------------|-----------------------|---------------------------------------------------|
| <u>Present-day values</u> |                                                                           |                       |                                                   |
| N                         | Os inventory in oceans                                                    | $7.2 \times 10^7$ mol | Peucker-Ehrenbrink & Ravizza (2000) <sup>17</sup> |
| $F_{riv}$                 | Riverine Os flux to oceans                                                | 1800 mol/yr           | Peucker-Ehrenbrink & Ravizza (2000) <sup>17</sup> |
| $F_{hyd}$                 | Hydrothermal Os flux to oceans                                            | 483 mol/yr            | Calculated for steady state at $R_{sw} = 1.06$    |
| $F_{ext}$                 | Extraterrestrial Os flux to oceans                                        | 80 mol/yr             | Peucker-Ehrenbrink & Ravizza (2000) <sup>17</sup> |
| $F_{sed}$                 | Sedimentary Os flux from oceans                                           | 2363 mol/yr           | Calculated for steady state                       |
| $R_{riv}$                 | <sup>187</sup> Os/ <sup>188</sup> Os composition of rivers                | 1.4                   | Peucker-Ehrenbrink & Ravizza (2000) <sup>17</sup> |
| $R_{hyd}$                 | <sup>187</sup> Os/ <sup>188</sup> Os composition of hydrothermal fluids   | 0.13                  | Meisel et al. (2001) <sup>18</sup>                |
| $R_{ext}$                 | <sup>187</sup> Os/ <sup>188</sup> Os composition of extraterrestrial dust | 0.13                  | Peucker-Ehrenbrink & Ravizza (2000) <sup>17</sup> |
| $R_{sw}$                  | <sup>187</sup> Os/ <sup>188</sup> Os composition of seawater              | 1.06                  | Peucker-Ehrenbrink & Ravizza (2000) <sup>17</sup> |
| <u>Pre-MECO values</u>    |                                                                           |                       |                                                   |
| N                         | Os inventory in oceans                                                    | $7.2 \times 10^7$ mol | Assumed similar to present-day value              |
| $F_{riv}$                 | Riverine Os flux to oceans                                                | 865 mol/yr            | Calculated for steady state at $R_{sw} = 0.55$    |
| $F_{hyd}$                 | Hydrothermal Os flux to oceans                                            | 1418 mol/yr           | Calculated for steady state at $R_{sw} = 0.55$    |
| $F_{ext}$                 | Extraterrestrial Os flux to oceans                                        | 80 mol/yr             | Assumed similar to present-day value              |
| $F_{sed}$                 | Sedimentary Os flux from oceans                                           | 2363 mol/yr           | Assumed similar to present-day value              |
| $R_{riv}$                 | <sup>187</sup> Os/ <sup>188</sup> Os composition of rivers                | 1.4                   | Assumed similar to present-day value              |
| $R_{hyd}$                 | <sup>187</sup> Os/ <sup>188</sup> Os composition of hydrothermal fluids   | 0.13                  | Assumed similar to present-day value              |
| $R_{ext}$                 | <sup>187</sup> Os/ <sup>188</sup> Os composition of extraterrestrial dust | 0.13                  | Assumed similar to present-day value              |
| $R_{sw}$                  | <sup>187</sup> Os/ <sup>188</sup> Os composition of seawater              | 0.55                  | This study                                        |

## Supplementary References

1. Seton, M. *et al.* Global continental and ocean basin reconstructions since 200Ma. *Earth-Science Rev.* **113**, 212–270 (2012).
2. Torsvik, T. H. *et al.* Phanerozoic polar wander, palaeogeography and dynamics. *Earth-Science Rev.* **114**, 325–368 (2012).
3. Sluijs, A., Zeebe, R. E., Bijl, P. K. & Bohaty, S. M. A middle Eocene carbon cycle conundrum. *Nat. Geosci.* **6**, 429–434 (2013).
4. Cramer, B. S., Toggweiler, J. R., Wright, J. D., Katz, M. E. & Miller, K. G. Ocean overturning since the late cretaceous: Inferences from a new benthic foraminiferal isotope compilation. *Paleoceanography* **24**, 1–14 (2009).
5. Gradstein, F. M., Ogg, J. G., Schmitz, M. & Ogg, G. *The Geologic Time Scale 2012 2-Volume Set.* (Elsevier, 2012).
6. Foster, G. L., Royer, D. L. & Lunt, D. J. Future climate forcing potentially without precedent in the last 420 million years. *Nat. Commun.* **8**, 1–8 (2017).
7. Anagnostou, E. *et al.* Changing atmospheric CO<sub>2</sub> concentration was the primary driver of early Cenozoic climate. *Nature* **533**, 380–384 (2016).
8. Cramwinckel, M. J. *et al.* Synchronous tropical and polar temperature evolution in the Eocene. *Nature* (2018). doi:10.1038/s41586-018-0272-2
9. Gradstein, F. M., Ogg, J. G. & Smith, A. G. *A Geologic Time Scale 2004.* (Cambridge University Press, 2005).
10. Ravizza, G. E. & Paquay, F. S. Os isotope chemostratigraphy applied to organic-rich marine sediments from the Eocene-Oligocene transition on the West African margin (ODP Site 959). *Paleoceanography* **23**, (2008).
11. Bohaty, S. M., Zachos, J. C., Florindo, F. & Delaney, M. L. Coupled greenhouse warming and deep-sea acidification in the middle Eocene. *Paleoceanography* **24**, (2009).
12. Shafik, S., Watkins, D. K. & Shin, I. C. Calcareous Nannofossil Paleogene Biostratigraphy, Côte D'Ivoire-Ghana Marginal Ridge, Eastern Equatorial Atlantic. *Proc. Ocean Drill. Program, Sci. Results* **159**, 413–431 (1998).
13. Westerhold, T., Röhl, U., Frederichs, T., Bohaty, S. M. & Zachos, J. C. Astronomical calibration of the geological timescale: Closing the middle Eocene gap. *Clim. Past* **11**, 1181–1195 (2015).
14. Pälike, H. *et al.* The heartbeat of the Oligocene climate system. *Science* **314**, 1894–

- 1898 (2006).
15. Westerhold, T. *et al.* Revised composite depth scales and integration of IODP Sites U1331-U1334 and ODP Sites 1218-1220. *Proc. Integr. Ocean Drill. Progr.* **320**, (2012).
  16. Toffanin, F., Agnini, C., Rio, D., Acton, G. & Westerhold, T. Middle Eocene to early Oligocene calcareous nannofossil biostratigraphy at IODP Site U1333 (equatorial Pacific). *Micropaleontology* **59**, 69–82 (2013).
  17. Peucker-Ehrenbrink, B. & Ravizza, G. E. The marine osmium isotope record. *Terra Nov.* **12**, 205–219 (2000).
  18. Meisel, T., Walker, R. J., Irving, A. J. & Lorand, J. P. Osmium isotopic compositions of mantle xenoliths: A global perspective. *Geochim. Cosmochim. Acta* **65**, 1311–1323 (2001).
