# Supplementary material for: Middle Eocene greenhouse warming facilitated by diminished weathering feedback
Source: PubMed Central journal article supplement (PMC6056486; doi:10.1038/s41467-018-05104-9), 2018-07-23
Supplement: 41467_2018_5104_MOESM2_ESM.pdf [file 41467_2018_5104_MOESM2_ESM.pdf]

## **Description of Additional Supplementary Files**

File Name: Supplementary Data 1

Description: All Re and Os data.

File Name: Supplementary Data 2

Description: Progressive two-component mixing model involving seawater and basalts.

File Name: Supplementary Software 1

Description: Os cycle model code.

Note: this code makes use of R package deSolve to solve differential equations.
